# Supplementary material for: p53 enables metabolic fitness and self-renewal of nephron progenitor cells
Source: Oxford University Press journal article supplement (doi:10.1242/dev.111617), 2015-03-24
Supplement: dev111617supp.pdf [file dev111617supp.pdf]

## **Supplementary Methods**

### **Immunofluorescence**

The following antibodies were used: Six2 (11562-1-AP7, Proteintech),  $\gamma$ H2Ax (Ab11174, Abcam), GFP (ab13970, Abcam), Cited1 (RB9219P1, Neomarkers, 1:50), Pax2 (71-6000, Invitrogen), Amphiphysin (13379-1-AP, Proteintech), BrdU (SC-32323, Santa Cruz), Meis1/2 (39795, Active Motif), Laminin (L9393, Sigma), cytokeratin (C2562, Sigma) and NCAM (C9672, Sigma); DAPI or Hoechst (Invitrogen) were used to stain nuclei. Primary antibodies were used at a 1:200 dilution. Whole-mount staining was done on E12.5-13.5 kidneys as previously described (Saifudeen et al, 2009). The immunofluorescent images were captured using a 3D or deconvolution scope (Leica DMRXA2) and staining intensity was quantified using Intelligent Imaging Innovations SlideBook software.

### **RNA-Seq**

The read quality codes (SamFlag codes “83”, “99”, “147” and “163”) which identified the reads that were paired and mapped in proper pairs were applied to control the quality for paired reads. Read Quality of paired-end RNA-Seq on Hi-Seq system was determined by the FastQC report of the raw readouts. Paired-end sequencing for each sample had a Phred Q30 score over 87%, indicating that over 87% of reads having a 99.9% base-calling accuracy (Table SI). Over x250 depth of coverage relative to GRCm38/mm10 transcriptome (61.4Mb, Illumina iGenome) was obtained. ~84% of ~200M total reads were successfully aligned for both genotypes. SamFlag filters were applied to ensure that reads were paired and mapped in proper pairs. Only properly paired reads from both ends were included for further analysis.

### **Nanostring nCounter expression analysis**

Overnight hybridization occurred for 22 hours at 65°C. Removal of excess probes with magnetic bead purification was performed on the nCounter Prep Station (software v4.0.11.2) on the Standard assay. Briefly, the probe-mRNA structure was affinity purified by its 3' end to remove excess reporter probes, then by its 5' end to remove excess capture probes. Once unbound probes were washed away, the tripartite structure was bound to the streptavidin-coated cartridge by the biotin capture probe, aligned by an electric current and immobilized. Photobleaching and fluorophore degradation was prevented with the addition of SlowFade. The cartridge containing immobilized samples was transferred to the nCounter Digital Analyzer (software v3.0.1.1) and scanned at 280 FOV. An epi-fluorescent microscope and CCD camera identified sets of fluorescent spots, which were tabulated for data output. Quality control metrics were recorded using the nSolver Analysis Software v1.1.

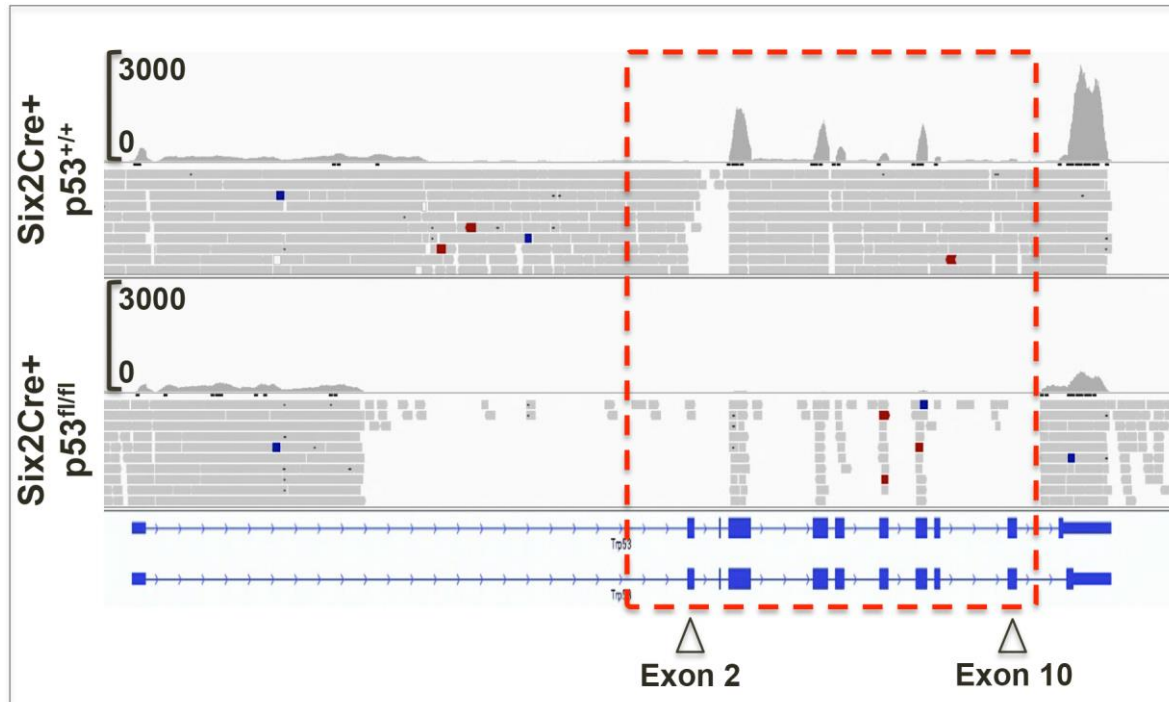

**Figure S1.** RNASeq shows loss of expression of exons 2-10 of p53 in Six2+ cells isolated from *Six2Cre+;p53<sup>fl/fl</sup>* kidneys.

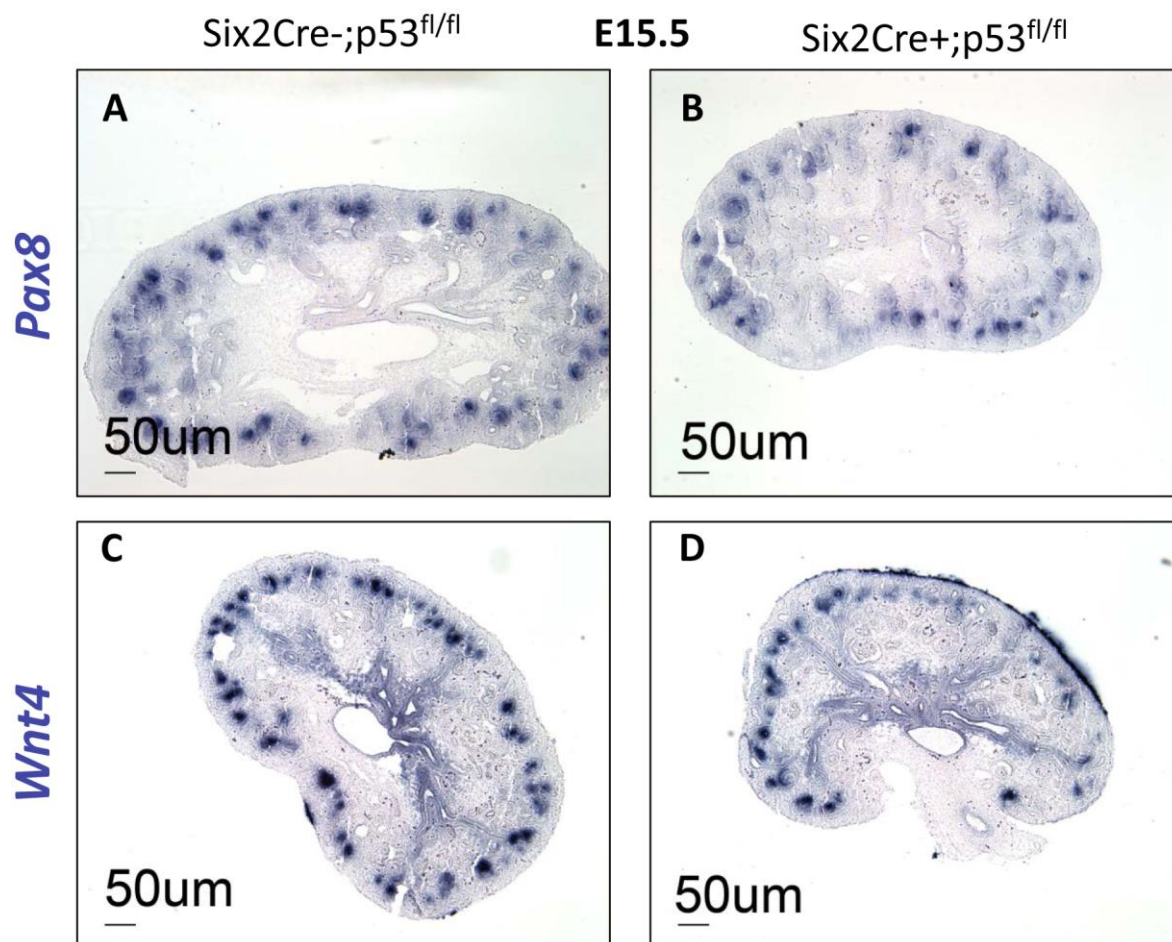

**Figure S2.** Expression of nephrogenesis regulators Pax8 and Wnt4 in E15.5 *Six2Cre+;p53<sup>fl/fl</sup>* kidneys is unchanged from that in littermate *Six2Cre-;p53<sup>fl/fl</sup>* wild-type kidneys.

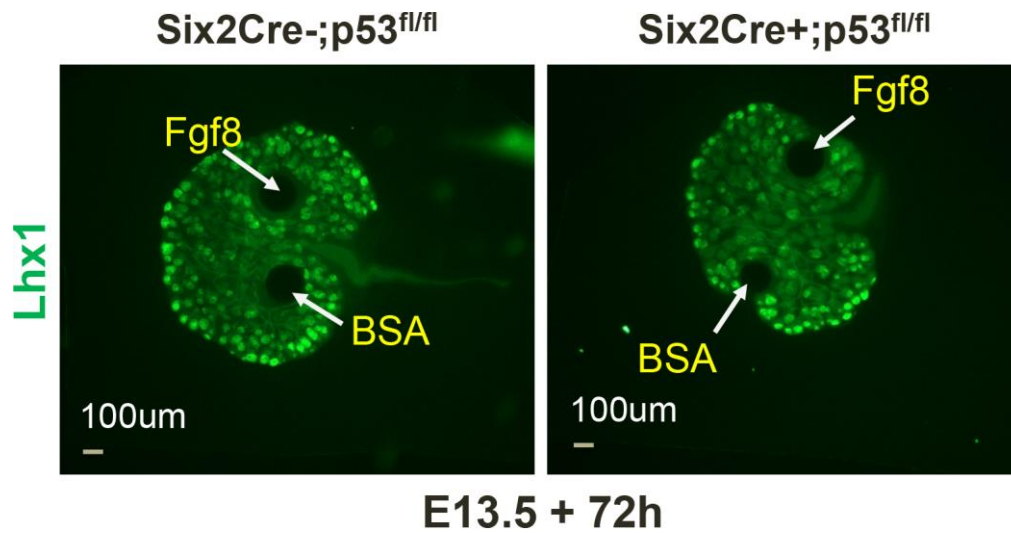

**Figure S3.** Fgf8 treatment does not rescue nephrogenesis in *Six2Cre+;p53<sup>fl/fl</sup>* kidneys. Fgf8 induces Lhx1+ structures around the bead (white arrow) in the littermate *Six2Cre-;p53<sup>fl/fl</sup>* wild-type kidney. No induction is observed around the control BSA-soaked bead. No induction of Lhx1+ nascent nephrons is observed around the Fgf8 bead in the mutant kidney.

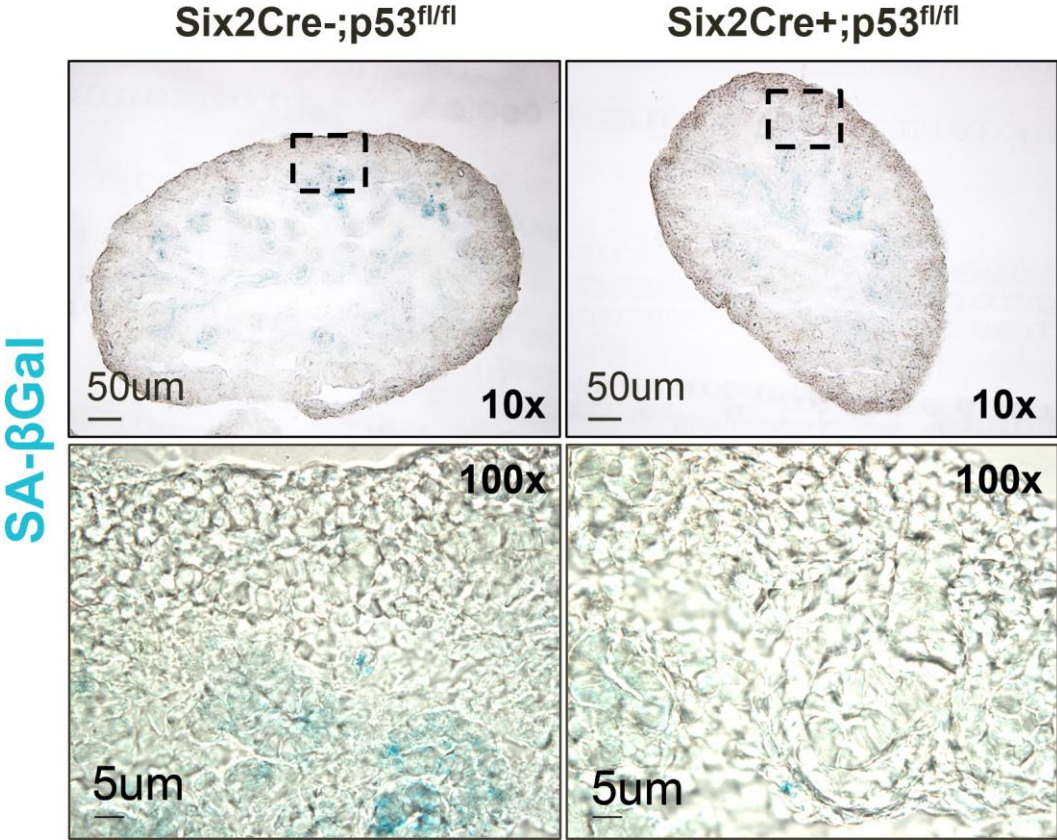

**Fig. S4.** Senescence-associated-βgal staining is not increased in Six2 p53-null CM in E15.5 kidneys.

**Table S1. RNA-Seq coverage and read quality**

|                          | <b>p53 wild-type</b>         |                      | <b>p53 conditional knockout</b> |                      |
|--------------------------|------------------------------|----------------------|---------------------------------|----------------------|
|                          | <b>Paired Read 1</b>         | <b>Paired Read 2</b> | <b>Paired Read 1</b>            | <b>Paired Read 2</b> |
|                          | <b>Read Quality (FastQC)</b> |                      |                                 |                      |
| <b>Phred Q&gt;=30</b>    | 88.93%                       | 87.78%               | 89.36%                          | 88.06%               |
| <b>Depth of Coverage</b> | X275                         |                      | X257                            |                      |
|                          | <b>Statistics of Reads</b>   |                      |                                 |                      |
| <b>Aligned Reads</b>     | 167,343,999                  |                      | 156,500,187                     |                      |
| <b>Total Reads</b>       | 200,116,046                  |                      | 187,658,886                     |                      |
| <b>Aligned/Total</b>     | 83.62%                       |                      | 83.40%                          |                      |

**Table S2. Differential expression of genes in Six2<sup>p53-/-</sup> CM determined by RNA-Seq**

| Gene Name      | FC       | Gene Name     | FC       |
|----------------|----------|---------------|----------|
| 41705          | 1.420244 | 4930481A15Rik | 0.219831 |
| 41886          | 0.582736 | 4930570G19Rik | 2.16717  |
| 0610005C13Rik  | 0.486587 | 4930578N16Rik | 1.683792 |
| 0610010O12Rik  | 0.412917 | 4933439C10Rik | 0.581051 |
| 0610040J01Rik  | 0.559685 | 5430407P10Rik | 1.463373 |
| 1190007I07Rik  | 0.685226 | 6030408B16Rik | 0.554225 |
| 1200009I06Rik  | 0.461455 | 6230427J02Rik | 0.556519 |
| 1300014I06Rik  | 0.530526 | 8430408G22Rik | 0.096555 |
| 1700007K13Rik  | 0.309722 | 8430419K02Rik | 0.154966 |
| 1700009P17Rik  | 0.444861 | 9030617O03Rik | 0.230407 |
| 1700011H14Rik  | 0.25172  | 9030624G23Rik | 1.666503 |
| 1700019G17Rik  | 0.662864 | A1cf          | 0.171713 |
| 1700029I01Rik  | 2.088414 | A230056P14Rik | 0.609644 |
| 1700047I17Rik2 | 0.585562 | A430110N23Rik | 0.521801 |
| 1700048O20Rik  | 1.522537 | A4galt        | 0.361717 |
| 1700106J16Rik  | 0.366094 | A530054K11Rik | 1.44095  |
| 1810013D15Rik  | 0.164123 | A730015C16Rik | 1.910716 |
| 1810019D21Rik  | 0.096555 | A830007P12Rik | 0.483069 |
| 1810019J16Rik  | 0.335371 | A930015D03Rik | 1.843482 |
| 2200002D01Rik  | 0.286467 | AA987161      | 1.481875 |
| 2210404O07Rik  | 0.525108 | Aadac         | 0.128328 |
| 2310007B03Rik  | 0.138581 | Aadat         | 0.170576 |
| 2310014L17Rik  | 1.499262 | Abcc2         | 0.126913 |
| 2410066E13Rik  | 1.472279 | Abcc9         | 0.492775 |
| 2410127L17Rik  | 0.685248 | Abhd1         | 1.771899 |
| 2610018G03Rik  | 1.593468 | Abhd14b       | 0.544077 |
| 2610021K21Rik  | 0.514458 | Abi3          | 0.218803 |
| 2610028E06Rik  | 0.694036 | AC027184.1    | 0.230935 |
| 2610035D17Rik  | 0.486011 | AC114588.1    | 15949.91 |
| 2610042L04Rik  | 8.418214 | AC122837.1    | 1.725297 |
| 2610301B20Rik  | 1.583862 | AC124113.1    | 7.81E-07 |
| 2610528J11Rik  | 0.148425 | AC125170.1    | 39772.54 |
| 2810008D09Rik  | 0.579027 | AC147549.1    | 0.000178 |
| 2900052L18Rik  | 0.510526 | AC151712.1    | 0.16152  |
| 3110047P20Rik  | 0.166722 | AC151712.4    | 1.415855 |
| 3632451O06Rik  | 2.333353 | AC158220.1    | 1.442914 |
| 4632428N05Rik  | 0.290443 | AC159308.1    | 2.494694 |
| 4930426D05Rik  | 1.476645 | AC159637.1    | 4285.82  |



|            |          |            |          |
|------------|----------|------------|----------|
| AC159748.1 | 0.61808  | Agxt2      | 0.052147 |
| AC162391.1 | 7.719727 | Ahcy       | 0.520814 |
| AC175032.1 | 0.226203 | Ahnak      | 0.327126 |
| AC175831.1 | 0.080114 | Ahr        | 1.659363 |
| AC214054.1 | 0.379746 | AI314831   | 0.657616 |
| AC242398.1 | 0.200394 | AI317395   | 0.06427  |
| Acaa1b     | 0.322874 | AI480526   | 0.513133 |
| Acap1      | 0.196744 | AI504432   | 1.617158 |
| Ace        | 0.142716 | AI593442   | 2.406154 |
| Ace2       | 0.376628 | AI606181   | 0.625479 |
| Acot3      | 0.323877 | AI607873   | 0.181018 |
| Acot4      | 0.379518 | AI661453   | 0.496858 |
| Acsm1      | 0.00027  | Aim1       | 0.464726 |
| Acsm2      | 0.145645 | Ajap1      | 0.711667 |
| Acta2      | 0.289546 | Ak1        | 0.686032 |
| Acvrl1     | 0.405725 | Akap12     | 0.479368 |
| Acy3       | 0.517337 | Akd1       | 0.339257 |
| Adam23     | 1.522263 | Akr1b8     | 0.614084 |
| Adamts17   | 2.130809 | Akr1c19    | 0.151578 |
| Adamts18   | 0.582717 | Akr1c21    | 0.100942 |
| Adamts2    | 0.494441 | AL807777.1 | 2.913382 |
| Adamts4    | 0.642124 | Alas2      | 0.034809 |
| Adamts5    | 0.41089  | Alcam      | 0.680501 |
| Adamts6    | 0.424333 | Aldh1a7    | 0.261928 |
| Adamtsl1   | 0.380561 | Aldh1l1    | 0.271216 |
| Adamtsl4   | 0.337455 | Aldh3b1    | 0.550317 |
| Adamtsl5   | 0.357444 | Aldh8a1    | 0.037392 |
| Adap2      | 0.088834 | Aldob      | 0.095223 |
| Adarb2     | 1.97317  | Aldoc      | 0.595111 |
| Adat2      | 1.568749 | Alg10b     | 1.401737 |
| Adc        | 0.662555 | Alox5      | 0.113637 |
| Adcy2      | 0.398618 | Alx1       | 0.323073 |
| Adcy5      | 0.556695 | Ambp       | 0.000438 |
| Adcyap1r1  | 0.395385 | Amd2       | 5.810391 |
| Adh1       | 0.566101 | Amdhd1     | 0.061698 |
| Adnp       | 1.38001  | Amn        | 0.187173 |
| Adra1d     | 0.196297 | Ang        | 0.319215 |
| Adra2b     | 0.196041 | Angpt2     | 0.445883 |
| Adssl1     | 0.369738 | Angptl4    | 0.682373 |
| Afm        | 0.125064 | Ankrd33b   | 0.397027 |
| Afp        | 0.131826 | Anks1b     | 2.362429 |
| Agmat      | 0.058712 | Anks4b     | 0.280143 |
| Agtr2      | 0.329282 | Ano3       | 0.292722 |

|          |          |               |          |
|----------|----------|---------------|----------|
| Ano4     | 0.171046 | Atp1a2        | 1.409504 |
| Anpep    | 0.35175  | Atp1b1        | 0.459165 |
| Anxa1    | 0.210728 | Atp6v0a4      | 0.170827 |
| Anxa2    | 0.386137 | Atp6v1b1      | 0.265506 |
| Anxa6    | 0.707751 | AW551984      | 0.596002 |
| Anxa7    | 0.670599 | AY036118      | 0.379026 |
| Aoah     | 0.000362 | B230217C12Rik | 0.588341 |
| Aoc3     | 0.32529  | B3gat2        | 0.513021 |
| Aox3     | 0.292077 | B3gnt5        | 1.531558 |
| Ap1m2    | 0.532172 | B3gnt8        | 0.552838 |
| Ap4e1    | 1.388435 | B3gnt9-ps     | 0.488709 |
| Apba1    | 0.579156 | B430203G13Rik | 3.003008 |
| Apbb1ip  | 0.266313 | B4galnt1      | 0.576173 |
| Aplnr    | 0.210044 | B630005N14Rik | 1.422563 |
| Apoe     | 0.503739 | Baiap2l2      | 0.273696 |
| Apom     | 0.451686 | BC002163      | 50246.43 |
| Apoo-ps  | 0.000632 | BC007180      | 5.724659 |
| Aqp1     | 0.15131  | BC020535      | 0.154481 |
| Aqp11    | 0.53262  | BC021785      | 0.287069 |
| Aqp2     | 0.239686 | BC023719      | 0.000231 |
| Arap1    | 0.463131 | BC025446      | 0.203977 |
| Arap3    | 0.590795 | BC035947      | 1.953777 |
| Arhgap15 | 0.088834 | BC049730      | 2419.426 |
| Arhgap24 | 0.550238 | Bcl11a        | 2.098543 |
| Arhgap5  | 1.484783 | Bcl11b        | 1.754652 |
| Arhgdib  | 0.519466 | Bcl2l14       | 0.242894 |
| Arhgef16 | 0.469289 | Bcl3          | 0.114536 |
| Arhgef19 | 0.545877 | Bcl6          | 1.454214 |
| Arid5b   | 1.797882 | Bcl6b         | 0.439362 |
| Arsb     | 0.692416 | Bglap-rs1     | 5.66054  |
| Arsi     | 0.517659 | Bgn           | 0.349965 |
| Arsj     | 0.286737 | Bhmt2         | 0.389305 |
| Art1     | 0.308246 | Bmi1          | 1.515573 |
| Art4     | 0.250177 | Bmp2          | 1.662084 |
| Asb4     | 0.437849 | Bmp3          | 0.338027 |
| Asb9     | 0.115451 | Bnc2          | 1.435832 |
| Aspa     | 0.138253 | Brwd3         | 1.446577 |
| Aspn     | 0.417494 | Bst2          | 0.410872 |
| Ass1     | 0.131981 | Btbd17        | 0.512205 |
| Astn2    | 0.588495 | Btg2          | 0.671052 |
| Atp11c   | 1.549265 | Btg3          | 0.649695 |
| Atp13a3  | 1.401094 | C130050O18Rik | 0.164123 |
| Atp13a4  | 0.234038 | C130074G19Rik | 0.238485 |

|               |          |          |          |
|---------------|----------|----------|----------|
| C1qa          | 0.13913  | Ccl21a   | 0.355142 |
| C1qb          | 0.151624 | Ccl21b   | 0.197657 |
| C1qc          | 0.107337 | Ccl24    | 0.000701 |
| C1qtnf2       | 0.27531  | Ccl3     | 0.145714 |
| C1qtnf3       | 0.456027 | Ccl6     | 0.092533 |
| C1qtnf5       | 0.150897 | Ccng1    | 0.587236 |
| C1ra          | 0.438363 | Cd109    | 0.402081 |
| C1s           | 0.390301 | Cd248    | 0.266653 |
| C230034O21Rik | 1.666562 | Cd36     | 0.154877 |
| C2cd4a        | 0.61151  | Cd44     | 1.940089 |
| C3ar1         | 0.207479 | Cd52     | 0.044645 |
| C530008M17Rik | 1.386137 | Cd53     | 0.130343 |
| C530028O21Rik | 4.715738 | Cd5l     | 0.000339 |
| CAA01064128.1 | 2.009603 | Cd74     | 0.534004 |
| Cacna1c       | 0.383788 | Cd82     | 0.654409 |
| Cacna1g       | 0.623255 | Cd93     | 0.220396 |
| Cacna2d1      | 1.414279 | Cd97     | 0.492639 |
| Cacna2d2      | 0.477912 | Cdc42ep1 | 0.406277 |
| Cacna2d3      | 0.226777 | Cdc42ep2 | 0.498523 |
| Cacnb4        | 1.450815 | Cdc42ep5 | 0.462653 |
| Cacng7        | 0.647208 | Cdca3    | 0.679387 |
| Cadps2        | 1.41742  | Cdcp1    | 0.522119 |
| Cage1         | 2.046642 | Cdh1     | 0.482804 |
| Calb1         | 0.571724 | Cdh16    | 0.329273 |
| Calml4        | 0.243147 | Cdh22    | 0.667187 |
| Capg          | 0.679281 | Cdh5     | 0.172096 |
| Car15         | 0.454054 | Cdh9     | 0.000404 |
| Car2          | 0.439774 | Cdhr1    | 0.427592 |
| Car3          | 0.387017 | Cdhr2    | 0.14272  |
| Car4          | 0.497071 | Cdhr5    | 0.310083 |
| Car8          | 1.782047 | Cdkl1    | 0.437346 |
| Card10        | 0.475526 | Cdkn1a   | 0.609561 |
| Casp12        | 0.342019 | Cdkn1c   | 0.597934 |
| Casq1         | 0.570041 | Cds1     | 0.648749 |
| Cav1          | 0.577321 | Cela1    | 0.244203 |
| Cbl           | 1.63482  | Celf2    | 1.456435 |
| Cblb          | 1.704284 | Celf4    | 0.594361 |
| Ccdc141       | 0.600008 | Cep170   | 1.479832 |
| Ccdc3         | 0.32991  | Cep290   | 1.639849 |
| Ccdc80        | 0.493755 | Cfb      | 0.344737 |
| Cck           | 0.201278 | Cfh      | 0.296624 |
| Cckar         | 0.293799 | Cfi      | 0.372366 |
| Ccl11         | 0.280407 | Cftr     | 0.677482 |

|          |          |            |          |
|----------|----------|------------|----------|
| Chdh     | 0.167769 | Col1a1     | 0.222326 |
| Chml     | 1.561846 | Col1a2     | 0.281412 |
| Chn2     | 1.425813 | Col23a1    | 0.368655 |
| Chrd     | 0.566934 | Col24a1    | 0.653336 |
| Chrdl1   | 1.527899 | Col25a1    | 0.586564 |
| Chst11   | 1.392081 | Col2a1     | 1.469911 |
| Chst8    | 0.585351 | Col3a1     | 0.258405 |
| Cisd3    | 0.513622 | Col4a4     | 0.544978 |
| Cited4   | 0.409457 | Col5a1     | 0.66666  |
| Clca1    | 0.413244 | Col5a2     | 0.461858 |
| Clcnka   | 0.305968 | Col5a3     | 0.209399 |
| Clcnkb   | 0.336517 | Col6a1     | 0.337963 |
| Cldn1    | 0.398866 | Col6a2     | 0.301147 |
| Cldn10   | 0.32844  | Col6a3     | 0.319327 |
| Cldn19   | 0.337896 | Col6a5     | 0.145018 |
| Cldn2    | 0.113482 | Col6a6     | 0.581014 |
| Cldn4    | 0.440081 | Col7a1     | 0.661209 |
| Cldn5    | 0.555266 | Col8a2     | 0.419615 |
| Cldn6    | 0.467583 | Col9a2     | 0.483053 |
| Cldn7    | 0.401535 | Colq       | 0.678051 |
| Cldn8    | 0.473883 | Comt       | 0.610094 |
| Clec18a  | 0.584466 | Corin      | 0.517703 |
| Clec2d   | 0.393873 | Cox6b2     | 0.54963  |
| Clec4n   | 0.100942 | Cpa1       | 0.284412 |
| Clec7a   | 0.000618 | Cpa2       | 0.420253 |
| Clic5    | 0.540265 | Cpb2       | 0.191263 |
| Clic6    | 0.357417 | Cpn1       | 0.34796  |
| Clock    | 1.50128  | Cpne8      | 0.435993 |
| Clrn3    | 0.128886 | Cpt1c      | 0.707605 |
| Cmah     | 1.621424 | Crabp1     | 0.597674 |
| Cmb1     | 0.497169 | Crb3       | 0.389979 |
| Cml1     | 0.318712 | Creb3l1    | 0.339279 |
| Cmtm5    | 0.409569 | Crhbp      | 23.71135 |
| Cndp1    | 0.26551  | Crip2      | 1.462117 |
| Cnksr1   | 0.529492 | Crispld2   | 0.513495 |
| Cnn2     | 0.525144 | Cryab      | 0.552838 |
| Cntn4    | 0.427093 | Csdc2      | 0.606672 |
| Cntn6    | 0.093394 | Csf1r      | 0.159596 |
| Cntnap5b | 0.03188  | Csf2rb     | 0.05921  |
| Col12a1  | 0.409008 | Csrnp3     | 0.507187 |
| Col14a1  | 0.383558 | Csrp1      | 0.506929 |
| Col15a1  | 0.271552 | CT030661.1 | 1.478381 |
| Col16a1  | 0.26923  | CT573034.1 | 1.510953 |

|               |          |               |          |
|---------------|----------|---------------|----------|
| Ctgf          | 0.665549 | Dapp1         | 0.43586  |
| Cth           | 0.611235 | Dbc1          | 0.27178  |
| Ctsc          | 0.70331  | Dcdc2a        | 0.521637 |
| Ctse          | 0.13304  | Dclk1         | 1.437842 |
| Ctsh          | 0.215119 | Dcn           | 0.316844 |
| Ctsk          | 0.294358 | Dctn3         | 0.683516 |
| Ctsl          | 0.702502 | Dcxr          | 0.627649 |
| Ctss          | 0.104925 | Ddn           | 0.097111 |
| CU463325.1    | 22.23686 | Ddr2          | 0.348327 |
| Cubn          | 0.152785 | Ddx3x         | 1.437855 |
| Cx3cr1        | 0.229794 | Ddx3y         | 0.650675 |
| Cxcr2         | 2.33872  | Dennd1c       | 0.417155 |
| Cyb561        | 0.694226 | Depdc1a       | 1.449802 |
| Cyba          | 0.635399 | Depdc1b       | 1.860391 |
| Cybb          | 0.188374 | Dkk1          | 0.539144 |
| Cygb          | 0.439456 | Dkk3          | 0.689676 |
| Cyp1b1        | 0.629375 | Dlk1          | 0.384593 |
| Cyp24a1       | 0.017437 | Dll4          | 0.272917 |
| Cyp26b1       | 0.353235 | Dmxl1         | 1.382333 |
| Cyp27a1       | 0.54612  | Dnajb9        | 1.518211 |
| Cyp27b1       | 0.153601 | Dnm1          | 0.678286 |
| Cyp2d26       | 0.062814 | Dnm3os        | 0.325515 |
| Cyp2j11       | 0.145714 | Doc2g         | 0.681417 |
| Cyp2j13       | 0.138307 | Dock8         | 0.368602 |
| Cyp2j5        | 0.056174 | Dok2          | 0.576194 |
| Cyp2j9        | 0.47729  | Dpep1         | 0.167652 |
| Cyp2s1        | 0.440397 | Dpf3          | 1.405438 |
| Cyp4a10       | 0.113518 | Dpp4          | 0.244934 |
| Cyp4a31       | 0.178409 | Dpt           | 0.053123 |
| Cyp7b1        | 0.61106  | Dsel          | 1.419074 |
| Cys1          | 0.335063 | Dusp14        | 0.537513 |
| Cyth4         | 0.242019 | Dusp15        | 0.504063 |
| D14Abb1e      | 1.43125  | Dusp23        | 0.632788 |
| D14Ertd449e   | 0.452665 | Dusp5         | 1.55656  |
| D430041D05Rik | 1.72415  | Duxbl         | 0.532765 |
| D630003M21Rik | 0.429293 | Dynlt1-ps1    | 1.791898 |
| D630023F18Rik | 0.201278 | Dysf          | 0.434084 |
| D630042F21Rik | 0.423937 | Dzip3         | 1.383978 |
| Daam2         | 0.498886 | E130203B14Rik | 0.609874 |
| Dach1         | 1.425868 | Ebf1          | 0.502832 |
| Dact1         | 0.663165 | Ebf3          | 0.41739  |
| Dact2         | 0.489904 | Echdc3        | 0.596649 |
| Dao           | 0.210299 | Ecm1          | 0.293921 |

|            |          |         |          |
|------------|----------|---------|----------|
| Ecscr      | 0.266965 | Erbp4   | 0.501343 |
| Eda2r      | 0.197733 | Esam    | 0.458467 |
| Edil3      | 0.4202   | Esrp1   | 0.395562 |
| Edn3       | 0.578057 | Esrp2   | 0.500717 |
| Ednrb      | 0.533239 | Esrrg   | 0.616486 |
| Egfr       | 0.497674 | Exoc5   | 1.43221  |
| Egln3      | 0.550142 | F13a1   | 0.236314 |
| Egr2       | 1.527387 | F2r     | 1.425565 |
| Egr3       | 1.570561 | F2rl1   | 0.224028 |
| Ehbp1l1    | 0.668276 | Fa2h    | 1.655575 |
| Ehd2       | 0.477317 | Fabp3   | 0.219597 |
| Ehf        | 0.456735 | Fabp4   | 0.285084 |
| Eif2s3y    | 0.668057 | Fads3   | 0.570796 |
| Eif3j      | 0.70747  | Fam107a | 1.569504 |
| Eif3s6-ps2 | 1588.749 | Fam126b | 1.488882 |
| Elf4       | 0.685044 | Fam129c | 1.535244 |
| Elmo1      | 0.57706  | Fam176b | 0.6417   |
| Elmod1     | 0.489557 | Fam198b | 0.509042 |
| Eln        | 0.413969 | Fam199x | 1.505068 |
| Elovl7     | 0.340703 | Fam19a4 | 2.061009 |
| Eltld1     | 0.289057 | Fam38b  | 0.595002 |
| Emcn       | 0.388693 | Fam46a  | 1.731218 |
| Emilin1    | 0.433936 | Fam65c  | 0.320576 |
| Emilin3    | 0.505704 | Fam70a  | 0.337928 |
| Emp1       | 0.363413 | Fam83h  | 0.680901 |
| Emp2       | 0.688964 | Fam84a  | 0.279188 |
| Emp3       | 0.625456 | Fap     | 0.210757 |
| Emr1       | 0.112915 | Fat2    | 1.515105 |
| Emx2       | 0.618405 | Fbln2   | 0.539665 |
| Eng        | 0.34286  | Fbln5   | 0.305788 |
| Enho       | 0.688695 | Fbp1    | 0.016281 |
| Enpep      | 0.389558 | Fbp2    | 0.107434 |
| Enpp3      | 0.383372 | Fcer1g  | 0.121599 |
| Enpp4      | 1.437831 | Fcgr1   | 0.09504  |
| Entpd8     | 0.13184  | Fcgr3   | 0.075494 |
| Epas1      | 0.589109 | Fcho2   | 1.528213 |
| Epb4.9     | 0.391818 | Fcna    | 0.033812 |
| Epha1      | 0.489924 | Fcrls   | 0.141523 |
| Epha3      | 0.433593 | Fermt1  | 0.417717 |
| Ephx2      | 0.650044 | Fez1    | 0.503153 |
| Eps8l1     | 0.344733 | Fga     | 0.100942 |
| Eps8l2     | 0.450048 | Fgd5    | 0.65208  |
| Erbp3      | 0.627815 | Fgf1    | 0.720848 |

|         |          |         |          |
|---------|----------|---------|----------|
| Fgfr4   | 0.512374 | Gca     | 0.495047 |
| Fggy    | 0.558625 | Gcnt2   | 1.482566 |
| Fhl2    | 0.631347 | Gcnt4   | 0.399954 |
| Fibin   | 0.496276 | Gdf7    | 0.523423 |
| Figf    | 0.251648 | Gem     | 2.665016 |
| Filip1l | 0.442268 | Gfra2   | 0.470258 |
| Fli1    | 0.456222 | Ggt1    | 0.135326 |
| Flnc    | 0.660726 | Ggt5    | 0.435026 |
| Flt1    | 0.257802 | Gimap4  | 0.264868 |
| Fmo2    | 0.454005 | Gimap5  | 0.158263 |
| Fmod    | 0.28715  | Gimap6  | 0.268746 |
| Fmr1    | 1.387139 | Gipc2   | 0.290347 |
| Fn1     | 0.685793 | Gja4    | 0.245821 |
| Folr1   | 0.204099 | Gjb1    | 0.12706  |
| Fosb    | 1.716378 | Glb1l2  | 0.600775 |
| Foxd1   | 0.69756  | Glcci1  | 1.68267  |
| Foxp2   | 0.400269 | Gli1    | 0.720559 |
| Frzb    | 1.462604 | Glipr2  | 0.534854 |
| Fut9    | 0.290558 | Glt8d2  | 0.371499 |
| Fxyd2   | 0.112032 | Glyat   | 0.23892  |
| Fxyd7   | 0.148191 | Glyctk  | 0.423876 |
| Fzd3    | 1.40013  | Gm10020 | 2.179812 |
| G0s2    | 0.539889 | Gm10039 | 0.000594 |
| G6pc    | 0.038474 | Gm10073 | 1.861478 |
| G6pc2   | 1.47734  | Gm10093 | 16.59042 |
| Gabra3  | 0.470505 | Gm10138 | 1453.107 |
| Gabrb2  | 1.606158 | Gm10159 | 1.41477  |
| Gal     | 5.744289 | Gm10171 | 5532.887 |
| Gal3st1 | 0.305968 | Gm10184 | 4.978838 |
| Galnt13 | 7.887014 | Gm10221 | 1.454328 |
| Galnt2  | 1.403524 | Gm10243 | 536.0705 |
| Galnt3  | 0.333581 | Gm10254 | 0.221514 |
| Galnt5  | 1.466516 | Gm10263 | 3.261562 |
| Galntl1 | 0.487603 | Gm10282 | 1.587845 |
| Gap43   | 0.436308 | Gm10340 | 3.473412 |
| Gapdh   | 0.545098 | Gm10393 | 0.199074 |
| Gas6    | 0.252574 | Gm10394 | 0.532322 |
| Gata2   | 0.469638 | Gm10395 | 0.623915 |
| Gata3   | 0.497851 | Gm10409 | 1.920626 |
| Gata5   | 0.471436 | Gm10433 | 3.908029 |
| Gata6   | 0.432456 | Gm10476 | 3.048923 |
| Gatm    | 0.476187 | Gm10479 | 2.401953 |
| Gbgt1   | 0.293406 | Gm10593 | 0.222717 |

|         |          |         |          |
|---------|----------|---------|----------|
| Gm10639 | 0.050984 | Gm13841 | 10.4507  |
| Gm10654 | 0.380502 | Gm13855 | 0.144408 |
| Gm10704 | 7.049909 | Gm13889 | 0.472166 |
| Gm10705 | 1.86927  | Gm14022 | 4.218421 |
| Gm10709 | 17.82323 | Gm14121 | 4429.874 |
| Gm11007 | 0.000526 | Gm14150 | 4.340172 |
| Gm11131 | 2.398637 | Gm14292 | 3.207734 |
| Gm11222 | 0.000619 | Gm14308 | 0.511144 |
| Gm11361 | 6.169029 | Gm14419 | 0.389721 |
| Gm11585 | 1844.261 | Gm14492 | 0.619879 |
| Gm11766 | 0.261159 | Gm14549 | 0.000183 |
| Gm11847 | 1.703767 | Gm14822 | 0.13284  |
| Gm11868 | 9.223152 | Gm15318 | 0.128322 |
| Gm12054 | 0.338934 | Gm15427 | 0.670909 |
| Gm12070 | 0.000162 | Gm15431 | 16.68832 |
| Gm12108 | 0.299726 | Gm15442 | 0.000707 |
| Gm12177 | 3.137365 | Gm15478 | 0.504782 |
| Gm12191 | 827454.9 | Gm15487 | 5.511118 |
| Gm12355 | 39.75356 | Gm15583 | 63.79762 |
| Gm12576 | 0.221308 | Gm15645 | 2.980428 |
| Gm12586 | 1954.668 | Gm15662 | 0.528569 |
| Gm12663 | 23304.11 | Gm15681 | 27.36355 |
| Gm12671 | 7.81E-07 | Gm15772 | 0.000702 |
| Gm12678 | 0.00035  | Gm15899 | 2213.334 |
| Gm12840 | 0.666147 | Gm15920 | 21.65356 |
| Gm12892 | 17.47805 | Gm15975 | 2.137834 |
| Gm13086 | 9.423475 | Gm15996 | 0.225805 |
| Gm13111 | 0.26024  | Gm16010 | 0.151366 |
| Gm13135 | 2.827393 | Gm16197 | 0.202364 |
| Gm13139 | 1.759266 | Gm16241 | 0.624955 |
| Gm13152 | 1.71967  | Gm16425 | 3.781926 |
| Gm13157 | 1.474231 | Gm16589 | 2184.944 |
| Gm13212 | 1.692822 | Gm17060 | 2.325035 |
| Gm13225 | 2.707573 | Gm17131 | 1.609378 |
| Gm13248 | 1.680571 | Gm17132 | 2.194174 |
| Gm13251 | 1.569269 | Gm17143 | 6.390233 |
| Gm13298 | 0.184518 | Gm17209 | 0.000633 |
| Gm13331 | 0.000229 | Gm17352 | 7.296088 |
| Gm13394 | 6.939504 | Gm17383 | 3.754819 |
| Gm13443 | 532.5634 | Gm17709 | 5.419666 |
| Gm13470 | 0.153807 | Gm18202 | 0.01376  |
| Gm13699 | 3.421018 | Gm2007  | 0.000526 |
| Gm13712 | 11.72961 | Gm20474 | 2.389438 |



|         |          |        |          |
|---------|----------|--------|----------|
| Gm20486 | 2.139381 | Gm5776 | 21640.66 |
| Gm20689 | 1758.039 | Gm5784 | 1.608821 |
| Gm20708 | 0.194622 | Gm5796 | 3.203009 |
| Gm22    | 0.18907  | Gm5806 | 45.26252 |
| Gm221   | 0.36289  | Gm5812 | 5.116046 |
| Gm2223  | 2.117192 | Gm5819 | 9.53916  |
| Gm2237  | 0.585505 | Gm5828 | 3172.293 |
| Gm2574  | 9.221256 | Gm5859 | 0.084551 |
| Gm2897  | 2.317442 | Gm5874 | 13983.71 |
| Gm2974  | 2.044953 | Gm5887 | 0.340301 |
| Gm3005  | 4.096747 | Gm5898 | 133.0455 |
| Gm3020  | 1.921175 | Gm6061 | 0.000265 |
| Gm3095  | 3.87936  | Gm6136 | 21.31045 |
| Gm3149  | 4.362216 | Gm6158 | 0.196041 |
| Gm3173  | 5.186403 | Gm6206 | 2.462538 |
| Gm3200  | 7.81E-07 | Gm6257 | 7.746929 |
| Gm3298  | 50.6685  | Gm6356 | 6.416952 |
| Gm3376  | 0.000671 | Gm6505 | 7.77778  |
| Gm3468  | 0.430382 | Gm6594 | 12.76843 |
| Gm3512  | 0.588887 | Gm6645 | 63.5368  |
| Gm3555  | 2719.101 | Gm6685 | 11.53173 |
| Gm3558  | 4.747521 | Gm6838 | 2.181132 |
| Gm3591  | 2.420748 | Gm6851 | 0.491687 |
| Gm3604  | 1.835636 | Gm6969 | 21356.75 |
| Gm3608  | 7.721863 | Gm6984 | 0.698192 |
| Gm3629  | 8.626232 | Gm7092 | 0.138487 |
| Gm3636  | 0.509267 | Gm7125 | 1431.026 |
| Gm3667  | 1.825048 | Gm7224 | 2279.578 |
| Gm3739  | 3.528825 | Gm7278 | 5.885935 |
| Gm3752  | 0.349546 | Gm7293 | 6.82328  |
| Gm3892  | 0.222717 | Gm7332 | 1.838109 |
| Gm4294  | 0.000119 | Gm7334 | 1.700686 |
| Gm4353  | 0.000284 | Gm7340 | 2.899994 |
| Gm4433  | 3.832545 | Gm7367 | 2.218669 |
| Gm4459  | 5.115185 | Gm7666 | 0.282675 |
| Gm4737  | 2788.813 | Gm7809 | 2.114187 |
| Gm4788  | 0.228522 | Gm7879 | 52145.42 |
| Gm4875  | 8.242876 | Gm7887 | 32.97358 |
| Gm5077  | 2.817316 | Gm8108 | 6.347821 |
| Gm5506  | 3.637123 | Gm8113 | 0.55597  |
| Gm5514  | 42.5916  | Gm8116 | 7.686379 |
| Gm5537  | 8171.074 | Gm8159 | 2084.001 |
| Gm5665  | 1.911302 | Gm8203 | 0.000356 |

|         |          |           |          |
|---------|----------|-----------|----------|
| Gm8210  | 10.4507  | Gstm6     | 0.167558 |
| Gm872   | 4.104311 | Gstt1     | 0.297812 |
| Gm8778  | 6100.691 | Gstt3     | 0.473133 |
| Gm8841  | 17.49051 | Gvin1     | 0.054478 |
| Gm9008  | 1.937608 | Gypa      | 0.203889 |
| Gm9531  | 1.379267 | H2-Ab1    | 0.512622 |
| Gm9746  | 0.623915 | H2-Ea-ps  | 1367.936 |
| Gm9747  | 0.511141 | H2-Eb1    | 0.562578 |
| Gm9755  | 0.288643 | H6pd      | 0.688974 |
| Gm9766  | 1.636148 | Hao       | 0.038474 |
| Gm9770  | 16.91601 | Habp2     | 0.282639 |
| Gm9781  | 1.746197 | Hao2      | 0.14097  |
| Gm9800  | 1.667543 | Hapl1     | 0.379111 |
| Gm9855  | 38.68615 | Hba-a1    | 0.039933 |
| Gm9885  | 0.30365  | Hba-a2    | 0.039607 |
| Gm9887  | 1.82459  | Hba-x     | 0.000553 |
| Gm9923  | 17278.02 | Hbb-b1    | 0.040923 |
| Gm996   | 0.000173 | Hbb-b2    | 0.029894 |
| Gna14   | 0.474704 | Hbb-y     | 0.027426 |
| Gnb3    | 0.569974 | Hck       | 0.284359 |
| Gng11   | 0.527134 | Hcls1     | 0.221228 |
| Gng8    | 0.254258 | Hcn1      | 2.270663 |
| Gpc4    | 0.544509 | Hdc       | 0.123899 |
| Gpd1    | 0.457702 | Hddc3     | 2.325347 |
| Gpihbp1 | 0.227004 | Hemk1     | 1.453001 |
| Gpr116  | 0.467393 | Hey1      | 1.397292 |
| Gpr160  | 0.351102 | Hgd       | 0.076362 |
| Gpr56   | 0.606599 | Hhip      | 1.557706 |
| Gprc5a  | 0.48266  | Hic1      | 0.379867 |
| Gpsm3   | 0.621777 | Hist1h2ag | 0.631001 |
| Gpx3    | 0.702604 | Hist1h2ah | 2.265216 |
| Grap    | 0.333907 | Hist1h2an | 3.592356 |
| Grb14   | 0.643038 | Hist1h2ao | 1352.164 |
| Grb7    | 0.659373 | Hist1h2bj | 0.540648 |
| Gria1   | 0.161853 | Hist1h2bp | 3.591706 |
| Gria4   | 0.352189 | Hist1h4c  | 0.35713  |
| Grik1   | 0.201278 | Hist1h4i  | 0.42808  |
| Grm7    | 0.209736 | Hlx       | 0.208766 |
| Gsdmd   | 0.506775 | Hmga1-rs1 | 960.1706 |
| Gsn     | 0.669954 | Hmha1     | 0.621544 |
| Gsta2   | 0.035118 | Hmox1     | 0.646786 |
| Gsta4   | 0.720861 | Hnf1a     | 0.229968 |
| Gstk1   | 0.66749  | Hnf1b     | 0.558363 |

|         |          |         |          |
|---------|----------|---------|----------|
| Hnf4a   | 0.21811  | Islr    | 0.486194 |
| Hoga1   | 0.42076  | Itga1   | 0.593377 |
| Homer1  | 1.443376 | Itgb6   | 0.200448 |
| Hopx    | 0.36052  | Itm2a   | 0.67746  |
| Hoxc11  | 0.719582 | Itpr3   | 0.461063 |
| Hp      | 0.268109 | Iyd     | 0.141979 |
| Hpn     | 0.227429 | Izumo4  | 0.568078 |
| Hsd17b2 | 0.000404 | Jdp2    | 0.56126  |
| Hsd17b7 | 1.711203 | Jmy     | 1.428256 |
| Hsd3b4  | 0.034764 | Kalrn   | 1.41633  |
| Hsd3b7  | 0.694604 | Kank3   | 0.673909 |
| Hspa12a | 0.698473 | Kank4   | 0.633932 |
| Hspb1   | 0.608527 | Kcnd2   | 0.210355 |
| Hsph1   | 1.407901 | Kcne1   | 0.443909 |
| Htr2b   | 0.448739 | Kcnf1   | 1.802893 |
| Ica1l   | 0.542215 | Kcnh1   | 0.418941 |
| Icam1   | 0.272611 | Kcnj15  | 0.100562 |
| Icam2   | 0.136974 | Kcnj16  | 0.275423 |
| Ifi204  | 10.75492 | Kcnj2   | 0.389742 |
| Ifi44   | 0.119904 | Kcnj8   | 0.31656  |
| Ifih1   | 0.182461 | Kcnk6   | 0.47845  |
| Ifit2   | 1.555983 | Kcnq5   | 1.558065 |
| Ifitm1  | 0.428673 | Kcnt2   | 0.443972 |
| Ifitm3  | 0.341906 | Kctd14  | 0.399343 |
| Ifltd1  | 0.071488 | Kdelr3  | 0.691137 |
| Igf1    | 0.341854 | Kdm5d   | 0.579185 |
| Igfbp3  | 0.539014 | Kdm6a   | 1.534633 |
| Igfbp6  | 0.356933 | Kdr     | 0.249175 |
| Igfbp7  | 0.296686 | Keg1    | 0.187799 |
| Ihh     | 0.18282  | Kif12   | 0.223641 |
| Ikbke   | 0.6229   | Kif21a  | 1.489591 |
| Ikzf3   | 1.711652 | Kif26a  | 0.631032 |
| Il11ra1 | 0.715898 | Kif27   | 1.862277 |
| Il1r1   | 0.420015 | Kifc3   | 0.641657 |
| Il20rb  | 0.567464 | Kirrel3 | 0.277426 |
| Il2rg   | 0.389664 | Kitl    | 3.24938  |
| Inpp4b  | 1.683354 | Kl      | 0.157108 |
| Inpp5d  | 0.192376 | Klf11   | 1.446428 |
| Iqgap2  | 1.663025 | Klf14   | 0.571004 |
| Irgm2   | 0.280481 | Klf2    | 0.659139 |
| Irx1    | 0.503156 | Klf4    | 1.646098 |
| Irx3    | 0.451038 | Klhdc4  | 0.707352 |
| Isg20   | 0.209398 | Klhl11  | 1.437052 |

|         |          |          |          |
|---------|----------|----------|----------|
| Klhl14  | 1.540971 | Lrrc17   | 0.489106 |
| Klhl4   | 0.465339 | Lrrc25   | 0.123189 |
| Klk8    | 0.627934 | Lrrc32   | 0.356996 |
| Kng2    | 0.172295 | Lrrc4c   | 1.749794 |
| Kpna2   | 0.385024 | Lrrc8b   | 1.410053 |
| Krt15   | 0.582832 | Lrrk2    | 0.645775 |
| Krt18   | 0.6262   | Lrrtm1   | 0.350891 |
| Krt7    | 0.358601 | Ltbp4    | 0.671764 |
| Krt8    | 0.345516 | Lum      | 0.284989 |
| Kynu    | 0.195236 | Ly6a     | 0.190116 |
| Lactb2  | 0.444552 | Ly6e     | 0.675821 |
| Lad1    | 0.457265 | Ly6h     | 0.259693 |
| Lama2   | 0.496503 | Ly86     | 0.248964 |
| Laptm5  | 0.511109 | Lyn      | 0.533447 |
| Lbh     | 0.609496 | Lynx1    | 0.459603 |
| Lcor    | 1.407981 | Lyplal1  | 1.445971 |
| Lcorl   | 1.425344 | Lysmd3   | 1.400981 |
| Lcp1    | 0.32374  | Lyve1    | 0.407419 |
| Ldb2    | 0.422153 | Lyz2     | 0.096655 |
| Leprel1 | 0.470471 | Madcam1  | 0.102548 |
| Lfng    | 0.526307 | Mal      | 0.283407 |
| Lgals1  | 0.52151  | Manba    | 0.521509 |
| Lgals12 | 0.165991 | Map3k2   | 1.445587 |
| Lgals9  | 0.261397 | Mapkapk3 | 0.587247 |
| Lgi2    | 0.619102 | Mapt     | 0.511486 |
| Lgi3    | 0.569936 | Marco    | 0.000478 |
| Lgr6    | 2.098297 | Matn1    | 0.375444 |
| Lif     | 0.309033 | Matn2    | 0.272649 |
| Lilrb4  | 0.000618 | Mbnl3    | 1.490899 |
| Limch1  | 1.39016  | Mcam     | 0.658785 |
| Lin7c   | 1.382191 | Mcf2     | 0.321983 |
| Lin9    | 1.421914 | Mdga2    | 1.463649 |
| Llgl2   | 0.709182 | Med1     | 1.410307 |
| Lmbrd2  | 1.441672 | Mef2c    | 1.61261  |
| Lmo2    | 0.467414 | Meg3     | 0.388097 |
| Lnp     | 1.403424 | Megf11   | 0.426568 |
| Lox     | 0.499428 | Megf6    | 1.515947 |
| Loxl1   | 0.54205  | Megf9    | 1.375464 |
| Loxl3   | 0.703795 | Meis1    | 0.602673 |
| Loxl4   | 0.39383  | Mep1a    | 0.086893 |
| Lrfn5   | 0.527132 | Mep1b    | 0.064516 |
| Lrp1    | 0.724899 | Mertk    | 0.51784  |
| Lrp2    | 0.317035 | Met      | 1.410368 |

|           |          |            |          |
|-----------|----------|------------|----------|
| Metap1d   | 0.656286 | Naa50      | 1.410801 |
| Mettl7b   | 0.051982 | Naalad2    | 0.372366 |
| Mfap5     | 0.193004 | Nanp       | 0.629018 |
| Mfng      | 0.4061   | Naprt1     | 0.549647 |
| Mgam      | 0.356709 | Napsa      | 0.109251 |
| Mgll      | 0.502324 | Nav2       | 1.476047 |
| Mid1      | 0.42863  | Nav3       | 0.628389 |
| Miox      | 0.032195 | Ncald      | 0.524825 |
| Mme       | 0.487551 | Ncapd2     | 0.577265 |
| Mmp17     | 0.575316 | Ncf1       | 0.430836 |
| Mmp23     | 0.62849  | Nckap1l    | 0.276498 |
| Mmp9      | 0.227749 | Ncrna00085 | 0.70084  |
| Mmrn2     | 0.492826 | Ndp        | 0.321969 |
| Mn1       | 0.501732 | Ndrg1      | 0.525332 |
| Mogat2    | 0.383104 | Ndufa4l2   | 0.264868 |
| Mpeg1     | 0.375628 | Neat1      | 0.195965 |
| Mrc1      | 0.275328 | Nefl       | 2.173514 |
| Mrpl48-ps | 6.462573 | Neurl1b    | 0.638748 |
| Mrvi1     | 0.381029 | Nfia       | 0.427533 |
| Ms4a6d    | 0.000457 | Nfib       | 0.398175 |
| Ms4a7     | 0.076585 | Nfix       | 0.515393 |
| Mst1r     | 0.534808 | Nhlrc1     | 1.560536 |
| Mt1       | 0.470057 | Nid1       | 0.502785 |
| Mt2       | 0.401998 | Nkain4     | 0.590846 |
| Mtap1b    | 1.484257 | Nmnat3     | 0.562668 |
| Mtap9     | 1.445692 | Nos3       | 0.354652 |
| mt-Atp8   | 2.57382  | Notch4     | 0.651789 |
| mt-Co2    | 0.665909 | Nphs1      | 0.090248 |
| mt-Co3    | 0.721    | Nphs2      | 0.020926 |
| mt-Nd3    | 1.712039 | Npr1       | 0.477426 |
| Myadm     | 0.710139 | Npr3       | 0.389328 |
| Myh11     | 0.389716 | Nr1d2      | 1.429673 |
| Myh7b     | 1.724628 | Nr1h5      | 3891.511 |
| MyI9      | 0.417315 | Nr2f1      | 0.700334 |
| Mylk      | 0.595608 | Nrcam      | 0.5685   |
| Myo15b    | 0.248522 | Nrip2      | 0.639655 |
| Myo1f     | 0.16396  | Nrp2       | 0.65606  |
| Myo5b     | 0.661056 | Nsg2       | 0.492132 |
| Myo7a     | 0.324881 | Nt5c1b     | 8.174121 |
| Myo7b     | 0.482495 | Ntm        | 0.456748 |
| N28178    | 0.248866 | Ntn1       | 0.213233 |
| Naa16     | 1.40571  | Ntrk1      | 0.558029 |
| Naa30     | 1.405086 | Ntrk3      | 0.479373 |

|              |          |          |          |
|--------------|----------|----------|----------|
| Nts          | 0.172571 | Pde1a    | 0.430861 |
| Ntsr1        | 0.610931 | Pde3a    | 0.600259 |
| Nuak1        | 1.389598 | Pde3b    | 1.427612 |
| Nudt8        | 0.67936  | Pde4b    | 0.464393 |
| Nxph1        | 47.97987 | Pde4c    | 0.493329 |
| Oasl1        | 0.110875 | Pdgfb    | 0.164186 |
| Oasl2        | 0.40349  | Pdgfra   | 0.319062 |
| Ocln         | 0.486747 | Pdgfrb   | 0.460361 |
| Odz4         | 1.405986 | Pdk4     | 1.720191 |
| Ogn          | 0.382769 | Pdlim2   | 0.481758 |
| Olfml2a      | 0.490716 | Pdlim5   | 0.655672 |
| Olfml3       | 0.329528 | Pdyn     | 2.298188 |
| Ooep         | 0.423237 | Pdzd3    | 0.389801 |
| Osgin1       | 0.056953 | Pdzk1    | 0.147575 |
| Osr2         | 0.572302 | Pdzk1ip1 | 0.151021 |
| P2ry6        | 0.251458 | Pdzrn3   | 0.368455 |
| P4ha3        | 1.38675  | Pecam1   | 0.338289 |
| Pabpc1l2a-ps | 0.147683 | Peg10    | 0.688224 |
| Padi2        | 1.415719 | Penk     | 0.336179 |
| Pah          | 0.060031 | Perp     | 0.398482 |
| Pak1         | 1.439918 | Pf4      | 0.211492 |
| Pak3         | 1.668871 | Pgbd1    | 1.506044 |
| Palm3        | 0.603245 | Pggt1b   | 1.389947 |
| Pappa        | 0.444448 | Pgm2     | 0.706056 |
| Paqr5        | 0.324858 | Phf15    | 0.384637 |
| Paqr6        | 0.403304 | Phf6     | 1.447921 |
| Paqr9        | 0.526203 | Phlda3   | 0.440431 |
| Park2        | 0.562963 | Phyhd1   | 0.278636 |
| Pcdh12       | 0.365224 | Pi15     | 0.430023 |
| Pcdh17       | 1.519127 | Pid1     | 0.6062   |
| Pcdh9        | 0.260015 | Pik3c2a  | 1.417955 |
| Pcdhb11      | 2.119191 | Pik3cg   | 0.231599 |
| Pcdhb13      | 2.013636 | Pipox    | 0.212674 |
| Pcdhb14      | 1.681442 | Pisd-ps1 | 0.606374 |
| Pcdhb16      | 1.501423 | Pitx2    | 0.033658 |
| Pcdhb6       | 1.709589 | Pkhd1    | 0.291636 |
| Pcdhb7       | 1.515512 | Pklr     | 0.148596 |
| Pck1         | 0.058793 | Pla1a    | 0.125339 |
| Pcolce       | 0.402722 | Pla2r1   | 0.615798 |
| Pcolce2      | 4.92252  | Plac8    | 0.324007 |
| Pcp4l1       | 12.59975 | Plagl1   | 0.646777 |
| Pcsk9        | 0.419583 | Plau     | 0.242627 |
| Pctp         | 0.364    | Plcb4    | 1.599046 |

|          |          |            |          |
|----------|----------|------------|----------|
| Plcd4    | 0.492683 | Ptgis      | 0.440759 |
| Plcl1    | 0.536228 | Ptgs1      | 0.55446  |
| Plcxd1   | 0.662154 | Ptk2b      | 0.287705 |
| Plekha6  | 0.483053 | Ptp4a1     | 1.387858 |
| Pls1     | 1.502513 | Ptpn4      | 1.458396 |
| Plscr2   | 0.35256  | Ptprb      | 0.14431  |
| Plvap    | 0.478507 | Ptrf       | 0.462713 |
| Plxna4   | 2.832738 | Ptx3       | 0.37678  |
| Plxnd1   | 0.672755 | Pycard     | 0.635091 |
| Pmm1     | 0.666677 | Pyroxd2    | 0.400336 |
| Pmp22    | 0.638142 | Qprt       | 0.358606 |
| Pnp2     | 2.83266  | R3hdml     | 0.021568 |
| Podn     | 0.147567 | Rab17      | 0.427244 |
| Podxl    | 0.19051  | Rab20      | 0.240622 |
| Pop4     | 0.671967 | Rab32      | 0.298123 |
| Postn    | 0.194664 | Rab37      | 0.552834 |
| Pou2f1   | 1.85788  | Rab3d      | 0.675836 |
| Pou3f1   | 1.530834 | Rab6b      | 0.261596 |
| Pou3f3   | 0.47882  | Rabggtb    | 1.431836 |
| Ppargc1b | 1.586663 | Rac2       | 0.192115 |
| Ppp1r13b | 0.691418 | Radil      | 0.472098 |
| Ppp1r14a | 0.518857 | Rai2       | 1.476466 |
| Ppp1r15a | 1.383268 | Rapgef3    | 0.399269 |
| Ppp1r1b  | 0.542207 | Rapgef6    | 1.417936 |
| Ppp1r3b  | 0.640196 | Rarg       | 0.479359 |
| Ppp1r3c  | 0.581656 | Rarres2    | 0.66837  |
| Ppp1r3e  | 0.514107 | Rasgef1b   | 1.702018 |
| Ppwd1    | 1.716686 | Rasgrp2    | 0.476906 |
| Prdm16   | 0.452329 | Rasgrp3    | 0.496211 |
| Prickle2 | 0.576953 | Rasip1     | 0.623976 |
| Prkcdbp  | 0.564064 | Rbm12b     | 1.892129 |
| Prl8a1   | 0.63316  | Rbm41      | 1.540565 |
| Prlr     | 0.121684 | Rbm47      | 0.491194 |
| Procr    | 0.362305 | Rbpsuh-rs3 | 0.112434 |
| Prodh2   | 0.099947 | Rdh19      | 0.059257 |
| Prox1    | 2.06981  | Rdh9       | 32.27477 |
| Prr15l   | 0.199686 | Rec8       | 0.107474 |
| Prrg1    | 1.557627 | Reln       | 0.465194 |
| Prss12   | 0.573311 | Ren1       | 0.113478 |
| Prss8    | 0.403575 | Rfk        | 1.523279 |
| Psg16    | 0.682999 | Rftn1      | 0.521786 |
| Pter     | 0.660031 | Rftn2      | 0.510525 |
| Ptgfr    | 0.277994 | Rgl1       | 0.66162  |

|               |          |           |          |
|---------------|----------|-----------|----------|
| Rgs1          | 0.173026 | S1pr3     | 0.419117 |
| Rgs5          | 0.272134 | Samd4     | 0.637126 |
| Rhbdl3        | 0.388947 | Samd8     | 1.395227 |
| Rhoj          | 0.399769 | Samd9l    | 0.185349 |
| Rif1          | 1.668781 | Sat1      | 0.685835 |
| Rnase12       | 0.520468 | Scai      | 1.425601 |
| Rnf138        | 1.405967 | Scarf1    | 0.620158 |
| Rnf152        | 1.49251  | Scarf2    | 0.680105 |
| Robo4         | 0.181169 | Scd1      | 0.67438  |
| Ror1          | 0.666489 | Scin      | 0.409569 |
| Rorc          | 0.558616 | Scn8a     | 0.557412 |
| RP23-388P16.2 | 0.000378 | Scn9a     | 0.216498 |
| RP23-71l22.6  | 1.999369 | Scnn1g    | 0.292194 |
| RP23-97D14.5  | 3317.398 | Sdk1      | 0.662802 |
| Rpl29         | 0.654309 | Sdpr      | 0.223889 |
| Rpl30-ps9     | 0.000438 | Selm      | 0.514734 |
| Rpl34-ps1     | 1720.841 | Sema3a    | 0.456135 |
| Rpl35a        | 0.686417 | Sema3e    | 0.40955  |
| Rpl35a-ps2    | 536.0705 | Sema4a    | 0.557301 |
| Rpl35a-ps3    | 536.0705 | Sema5b    | 0.445827 |
| Rpl35a-ps4    | 536.0705 | Sepp1     | 0.582153 |
| Rpl35a-ps6    | 536.0705 | Serpina1a | 0.124325 |
| Rpl38-ps2     | 3714.861 | Serpina1b | 0.105355 |
| Rpl3-ps1      | 3929973  | Serpina3g | 0.120063 |
| Rprm          | 0.469461 | Serpina6b | 0.309711 |
| Rps13         | 0.694759 | Serpina9  | 0.580276 |
| Rps13-ps1     | 43.77014 | Serpine2  | 0.560956 |
| Rps18         | 0.656357 | Serpinf2  | 0.10385  |
| Rps2          | 0.58335  | Serping1  | 0.50807  |
| Rps27a-ps2    | 1937.844 | Sertad4   | 0.537084 |
| Rps2-ps13     | 2.290787 | Sesn2     | 0.670437 |
| Rps4y2        | 0.717697 | Sfpi1     | 0.291086 |
| Rps6ka3       | 1.428395 | Sfrp1     | 0.650289 |
| Rps7          | 0.509835 | Sgce      | 0.279516 |
| Rpsa-ps10     | 0.22043  | Sgk1      | 1.448187 |
| Rras          | 0.581664 | Sgk2      | 0.056511 |
| Rsad2         | 0.134414 | Sgpp2     | 0.560323 |
| Rtn2          | 0.636197 | Sh2d3c    | 0.511365 |
| Rtn4rl1       | 0.396923 | Sh2d4a    | 0.535462 |
| Rxfp2         | 0.297303 | Sh3bgrl   | 1.377109 |
| S100a10       | 0.48036  | Sh3gl3    | 1.680586 |
| S100a16       | 0.63099  | Sh3tc1    | 0.190903 |
| S100a6        | 0.280642 | Sigirr    | 0.155611 |



|          |          |          |          |
|----------|----------|----------|----------|
| Sim1     | 0.576258 | Slc52a3  | 0.294474 |
| Sim2     | 0.47679  | Slc5a1   | 0.143427 |
| Six4     | 1.398249 | Slc5a11  | 0.281975 |
| Skap1    | 0.64905  | Slc5a2   | 0.126466 |
| Skil     | 1.407185 | Slc5a3   | 1.671867 |
| Slc10a5  | 0.074058 | Slc5a8   | 0.111492 |
| Slc11a1  | 0.177845 | Slc5a9   | 0.13184  |
| Slc12a1  | 0.477244 | Slc6a18  | 0.105116 |
| Slc13a2  | 0.100841 | Slc6a20b | 0.052196 |
| Slc13a3  | 0.085117 | Slc7a11  | 2.365173 |
| Slc15a2  | 2.770441 | Slc7a12  | 0.035992 |
| Slc16a12 | 0.476975 | Slc7a13  | 0.117494 |
| Slc16a2  | 0.38557  | Slc7a7   | 0.451875 |
| Slc16a4  | 0.339836 | Slc7a8   | 0.251    |
| Slc16a5  | 0.293482 | Slc7a9   | 0.337896 |
| Slc17a1  | 0.054246 | Slc8a1   | 0.67015  |
| Slc17a3  | 0.138317 | Slc8a2   | 0.711831 |
| Slc17a8  | 0.210145 | Slc9a3r2 | 0.677579 |
| Slc18a1  | 0.20215  | Slco1a4  | 0.370106 |
| Slc22a1  | 0.105633 | Slco1a6  | 0.435774 |
| Slc22a12 | 0.099001 | Slco2a1  | 0.402441 |
| Slc22a13 | 0.043936 | Slco2b1  | 0.205796 |
| Slc22a19 | 0.049195 | Slfn9    | 1.439356 |
| Slc22a2  | 0.131779 | Slitrk5  | 0.276543 |
| Slc22a22 | 0.075605 | Slitrk6  | 0.225969 |
| Slc22a3  | 0.225805 | Smagp    | 0.361641 |
| Slc22a6  | 0.045032 | Smarca1  | 0.711959 |
| Slc22a8  | 0.081332 | Smoc1    | 0.310652 |
| Slc23a1  | 0.177017 | Smoc2    | 0.381455 |
| Slc25a45 | 0.161871 | Sned1    | 0.476436 |
| Slc27a2  | 0.123336 | Snhg11   | 0.586139 |
| Slc2a2   | 0.200616 | Sntb2    | 1.450047 |
| Slc34a1  | 0.085867 | Snx32    | 0.518469 |
| Slc35f4  | 1578.234 | Socs2    | 0.436408 |
| Slc39a5  | 0.147433 | Sod3     | 0.156716 |
| Slc3a1   | 0.174773 | Sorcs2   | 0.624537 |
| Slc40a1  | 0.454733 | Sos1     | 1.45129  |
| Slc44a3  | 0.207566 | Sostdc1  | 0.312483 |
| Slc44a4  | 0.230085 | Sox11    | 1.40164  |
| Slc47a1  | 0.181392 | Sox17    | 0.196297 |
| Slc4a1   | 0.124708 | Sox18    | 0.395766 |
| Slc4a7   | 1.559199 | Sp4      | 1.43524  |
| Slc4a9   | 0.145714 | Sp5      | 1.469796 |

|         |          |          |          |
|---------|----------|----------|----------|
| Sparcl1 | 0.443764 | Tagln2   | 0.634796 |
| Spink3  | 0.119777 | Tap1     | 0.564384 |
| Spint1  | 0.480419 | Tbk1     | 1.420587 |
| Spint2  | 0.684321 | Tbx10    | 0.324547 |
| Spock1  | 0.596187 | Tbx18    | 0.291622 |
| Spon2   | 0.234359 | Tbx2     | 0.356062 |
| Spopl   | 1.988224 | Tbx3     | 0.327296 |
| Spp1    | 0.048119 | Tbxa2r   | 0.435596 |
| Spp2    | 0.063989 | Tcea3    | 0.471298 |
| Spry2   | 1.393867 | Tcerg1l  | 0.177074 |
| Spty2d1 | 1.42     | Tcf15    | 0.324187 |
| Srp54c  | 0.597931 | Tcf21    | 0.67356  |
| Srpx    | 0.489233 | Tchh     | 0.459059 |
| Srpx2   | 0.29413  | Tcn2     | 0.665269 |
| Sstr1   | 2.155827 | Tdg      | 0.707539 |
| St14    | 0.321507 | Tek      | 0.295462 |
| St8sia1 | 0.479926 | Tekt1    | 0.511966 |
| Stab1   | 0.241832 | Tekt2    | 0.422392 |
| Stab2   | 0.097835 | Tfap2b   | 0.415344 |
| Stac2   | 1.912514 | Tfcp2l1  | 0.375437 |
| Stard10 | 0.471581 | Tfec     | 0.127026 |
| Stard8  | 0.450192 | Tgfb1    | 0.512055 |
| Stbd1   | 0.538312 | Tgfb1i1  | 0.535602 |
| Steap2  | 0.617073 | Tgfbr3   | 0.622022 |
| Stk32b  | 0.460834 | Tgm1     | 0.36289  |
| Stmn2   | 0.089563 | Tgm2     | 0.310717 |
| Stx3    | 0.53274  | Tgm5     | 0.253397 |
| Sucnr1  | 0.089775 | Thbs2    | 0.407013 |
| Sult1d1 | 0.160387 | Thns12   | 0.618407 |
| Sult1e1 | 0.1582   | Thoc2    | 1.473461 |
| Sult5a1 | 0.500557 | Thsd1    | 0.444708 |
| Susd2   | 0.215702 | Thsd7a   | 0.313302 |
| Susd3   | 0.188945 | Thy1     | 0.244127 |
| Svop    | 0.260301 | Tie1     | 0.188759 |
| Synm    | 2.03849  | Timp3    | 0.575016 |
| Synpo   | 0.387996 | Tinag    | 0.109072 |
| Synpo2  | 0.52871  | Tinagl1  | 0.416637 |
| Syt13   | 0.405901 | Tlr12    | 0.273746 |
| Syt4    | 2.637069 | Tm4sf1   | 0.574085 |
| Sytl2   | 0.499563 | Tmem119  | 0.255156 |
| Tacstd2 | 0.433455 | Tmem125  | 0.417751 |
| Tagap   | 2.358344 | Tmem132e | 0.26343  |
| Tagln   | 0.279027 | Tmem150a | 0.588138 |

|          |          |         |          |
|----------|----------|---------|----------|
| Tmem171  | 0.411469 | Tspan4  | 0.68639  |
| Tmem174  | 0.108252 | Tspan8  | 0.350102 |
| Tmem204  | 0.479689 | Ttc30b  | 1.520198 |
| Tmem229a | 0.337996 | Ttc36   | 0.153766 |
| Tmem27   | 0.117955 | Ttll10  | 0.256804 |
| Tmem45a  | 0.600436 | Ttr     | 0.07078  |
| Tmem45b  | 0.136435 | Ttyh2   | 0.623855 |
| Tmem54   | 0.092401 | Tuba1c  | 1.875959 |
| Tmem82   | 0.470097 | Tuba4a  | 0.261494 |
| Tmem88   | 0.463177 | Tubb2a  | 0.523931 |
| Tmf1     | 1.428854 | Tubb6   | 0.558864 |
| Tmigd1   | 0.08747  | Twist1  | 0.375791 |
| Tmprss2  | 0.312934 | Twist2  | 0.376421 |
| Tmsb4x   | 0.668622 | Tyrobp  | 0.186987 |
| Tmtc1    | 0.312741 | Uba6    | 1.388395 |
| Tnfaip6  | 1.843677 | Ube2l6  | 0.528864 |
| Tnfrsf19 | 1.428597 | Ube3a   | 1.532744 |
| Tnfrsf1b | 0.440162 | Uggt2   | 1.412995 |
| Tnfsf13b | 0.314308 | Ugt1a10 | 0.139918 |
| Tnik     | 0.611163 | Ugt1a2  | 0.133743 |
| Tnni1    | 0.513067 | Ugt1a6a | 0.216477 |
| Tnnt1    | 0.440064 | Ugt1a7c | 0.268222 |
| Tnnt2    | 0.433639 | Ugt1a9  | 0.125045 |
| Tnxb     | 0.211805 | Ugt2b34 | 0.17669  |
| Tpd52l1  | 0.662608 | Ugt2b37 | 0.071075 |
| Traf1    | 0.662009 | Ugt2b5  | 0.073897 |
| Trf      | 0.158177 | Ugt8a   | 0.376455 |
| Trh      | 0.344051 | Ulbp1   | 4.209251 |
| Trib1    | 1.41565  | Unc5a   | 0.455085 |
| Trim10   | 0.061972 | Unc93b1 | 0.515615 |
| Trim23   | 1.500682 | Ush1c   | 0.316664 |
| Trim25   | 2.129457 | Ushbp1  | 0.401012 |
| Trim30a  | 0.000325 | Uty     | 0.64086  |
| Trim47   | 0.428136 | Vamp5   | 0.373625 |
| Trim61   | 0.442321 | Vav1    | 0.076585 |
| Trove2   | 1.428028 | Vcam1   | 0.328185 |
| Trp53    | 0.083839 | Vcp-rs  | 1390.018 |
| Trpm5    | 0.278376 | Veph1   | 0.407773 |
| Trpv2    | 0.31176  | Vil1    | 0.227654 |
| Trpv4    | 0.515981 | Vim     | 0.634358 |
| Tshz3    | 0.367821 | Vps13a  | 1.611094 |
| Tsix     | 5.572138 | Vsig8   | 2.169307 |
| Tspan11  | 0.551842 | Vstm2b  | 0.463928 |

|         |          |
|---------|----------|
| Vwc2    | 3.461467 |
| Wdr86   | 0.584216 |
| Wfdc2   | 0.678233 |
| Wisp1   | 0.520938 |
| Wnt2b   | 0.521706 |
| Wnt5a   | 0.567408 |
| Wnt7b   | 0.418057 |
| Wscd2   | 0.50695  |
| Xist    | 4.568266 |
| Xlr3a   | 1.723447 |
| Xlr3c   | 4.848238 |
| Xpnpep2 | 0.280703 |
| Xylt1   | 1.683866 |
| Ybx2    | 0.537671 |
| Zbtb7c  | 0.678776 |
| Zcchc5  | 0.327117 |
| Zdhhc2  | 1.429555 |
| Zfhx4   | 1.770981 |
| Zfp141  | 1.465079 |
| Zfp239  | 1.766179 |
| Zfp280d | 1.446253 |
| Zfp322a | 1.554896 |
| Zfp36   | 0.659788 |
| Zfp458  | 1.780415 |
| Zfp459  | 2.716278 |
| Zfp503  | 1.383221 |
| Zfp536  | 0.365049 |
| Zfp663  | 0.061972 |
| Zfp781  | 9911.289 |
| Zfp808  | 1.813655 |
| Zfp874a | 0.625563 |
| Zfp934  | 1.686057 |
| Zfp942  | 1.637666 |
| Zfp949  | 1.559408 |
| Zfpm2   | 0.516776 |
| Zmat3   | 0.711961 |
| Zxdb    | 1.46981  |

**Table S3. Expression of Cell Cycle genes in *Six2*<sup>p53-/-</sup> CM**

| Gene         | Fold Change | [WT] FPKM | [KO] FPKM | Function                         |
|--------------|-------------|-----------|-----------|----------------------------------|
| p21 (Cdkn1a) | -1.7        | 22.5      | 12.7      | G1/S regulation, Senescence      |
| p27 (Cdkn1b) | 1.2         | 11.8      | 13.3      | G1 arrest                        |
| p57 (Cdkn1c) | -1.6        | 291.3     | 170.4     | G1 arrest                        |
| p16 (Cdkn2a) | /           | 0.1       | 0.0       | Regulation of G1/S Transition    |
| p15 (Cdkn2b) | /           | /         | /         | G1 arrest                        |
| Cdc27        | 1.2         | 18.6      | 21.4      | APC Complex, the exit of mitosis |
| Ccnb1        | 1.4         | 13.0      | 17.3      | G2/M transition                  |
| Ccnd2        | -1.3        | 51.9      | 38.1      | G1/S Transition                  |
| Ccng1        | -1.7        | 15.3      | 8.8       | G1 phase arrest                  |
| Ccng2        | 1.2         | 18.2      | 20.9      | G1/S arrest                      |

**Table S4. Nanostring nCounter probe target sequences**

| Gene Name     | Accession      | Target Region | Target Sequence                                                                                      |
|---------------|----------------|---------------|------------------------------------------------------------------------------------------------------|
| Aldob         | NM_144903.2    | 1307-1406     | ttgaaacccaagaatgagcatgtcaccacaaatagtctcaacactccagttccctatgttccagaacattcatccagaaaagaacaggccacgactga   |
| B2m           | NM_009735.3    | 178-277       | ctgaactgctacgtaacacagttccaccgcctcacattgaaatccaaatgctgaagaacgggaaaaaaattcctaaagtagagatgtcagatatgtcct  |
| Col1a1        | NM_007742.3    | 216-315       | caatggtagagacgtggaacccgaggtatgctgtatctgtatctgccacaatggcagcggtgtgtcggatgacgtgcaatgcaatgaagaactggactgt |
| Col1a2        | NM_007743.2    | 4026-4125     | gctgtgcttctgcagggtccaacgatgtgaactgttgctgagggcaacagcaggttcacactctgtccttagtcgatggctgtcctcaaaaagacaa    |
| Col6a1        | NM_009933.4    | 2345-2444     | acctctcagtgctctgtgggagacattcaggtagtttctgtgggaatcaaggatgtttggcttggcgggctccgaccagctcaatgtcatt          |
| Col6a2        | NM_146007.2    | 2059-2158     | tggctctcgtcatcgacagttctgagagtattggctacaccaactcacctggagaagaacttgcacatcaatgtggtcaacaggctagtgccattgc    |
| Col6a3        | NM_001243008.1 | 4555-4654     | tcgtcttctgattgacagctctgatgccgtcaagccgatggcatcgctcatatccgagacttgcagcaggatcgttcgcagactcaacattggctc     |
| Fbp1          | NM_019395.3    | 1281-1380     | agcagagctcaagtgacgctactccattctgcatgtgtacattcctagaacaaacctaacagcgtggatagttcacagcttaatgcttgcaatgcc     |
| Gapdh         | NM_008084.1    | 756-855       | atgtgctcgtggtgactgacgtgccgcctggagaacacctgccaagatgatgacatcaagaagggtggaagcaggcatctgagggcccactgaagg     |
| Gm5506 (Eno1) | NM_001025388.1 | 17-116        | acacagacactgctagaactattgtggttgcttaatgctgaattatgtaaatcggttctcaattgcatgagaatctgcatgtaagaagcgatc        |
| Gpd1          | NM_010271.2    | 2065-2164     | gcccttctttgcccgaagctgttctcaccagcctggaaggccaccggcatctgtaggcttagaactaaggagcagctcaaaggtcagtaggttc       |
| Gpd2          | NM_010274.3    | 559-658       | tccagaaggctatcatgaactggatgttgagcagatagggatgggaaagaagcccttcacgaacgtgccaacttactagaaatcgctcctcattatc    |
| H6pd          | NM_173371.3    | 825-924       | tctcagcccagcagctggctcagaactgggagctttccaggaggaggagatgtaccgtgtggatcattacctggcaagcaggcgggtgctcagat      |
| Ndufs5        | NM_001030274.1 | 111-210       | tcagcctggaccggcactttatgttctaagcgcagaacagccctataagaacgccgctcgggtccacgcatttgaaaaagagtggatagagtgtcaca   |
| Pck1          | NM_011044.2    | 2125-2224     | gaaaagcacttttaatagtcaagttgagtagcacagagaacaggctaggggcaaataagattgggagggaaatcaccgcatagtctgaagttgcat     |
| Pck2          | NM_028994.2    | 1663-1762     | tccactgccgctgaggacacaaaggaaagaccattatgcatgatcccttggcatggccttttttggctataactttggacgctacctggaacact      |
| Pfkl          | NM_008826.4    | 3171-3270     | agaggagactgcatgtcagtagtctgtggctgattgctgccctcaggaggttctgaggtcgggacgttggctcctcagagaagttatgaag          |
| Pgk1          | NM_0088        | 37-136        | ccggcattctgcacgctcaaaagcgcagctgtccgcgctgttctcctctctcatctccggccttgcacctcac                            |

|       |                 |               |                                                                                                          |
|-------|-----------------|---------------|----------------------------------------------------------------------------------------------------------|
|       | 28.2            |               | gggttgccaaaatgctgctt                                                                                     |
| Pgm1  | NM_0257<br>00.2 | 1149-<br>1248 | aagatcaaagtaacctcaaagacacatacatgctgtccagcactgtttcctccaaaatcttgcgggccatagccct<br>gaaggaaggctttcatttcgagga |
| Pklr  | NM_0136<br>31.2 | 2381-<br>2480 | tagtcttactttctactgactccacaaacctggagccgagcttacgagccactaatctggctgttctctgccact<br>gatctgctgggtcagatgaaa     |
| Tbp   | NM_0136<br>84.3 | 1-170         | gtggcgggtatctgctggcggttggctaggttctgctgctgctgctcattttctccgagtgcccagcatcactattcat<br>gggtgtgaagataaccca    |
| Trp53 | NM_0116<br>40.3 | 221-<br>320   | tttcaggcttatggaaactctcctccagaagatatcctgcatcacctcactgcatggacgatctgtgctgcccc<br>aggatgtgaggagtttttg        |
